# Supplementary material for: The DNA damage checkpoint pathway promotes extensive resection and nucleotide synthesis to facilitate homologous recombination repair and genome stability in fission yeast
Source: PubMed Central journal article supplement — Nucleic Acids Res. 2014 Mar 12;42(9):5644–56. doi: 10.1093/nar/gku190 (PMC4027169; doi:10.1093/nar/gku190), 2014-03-12
Supplement: supp_gku190_nar-02537-d-2013-File009.pdf [file supp_gku190_nar-02537-d-2013-File009.pdf]

# Blaikley et al Supplementary Figure 1

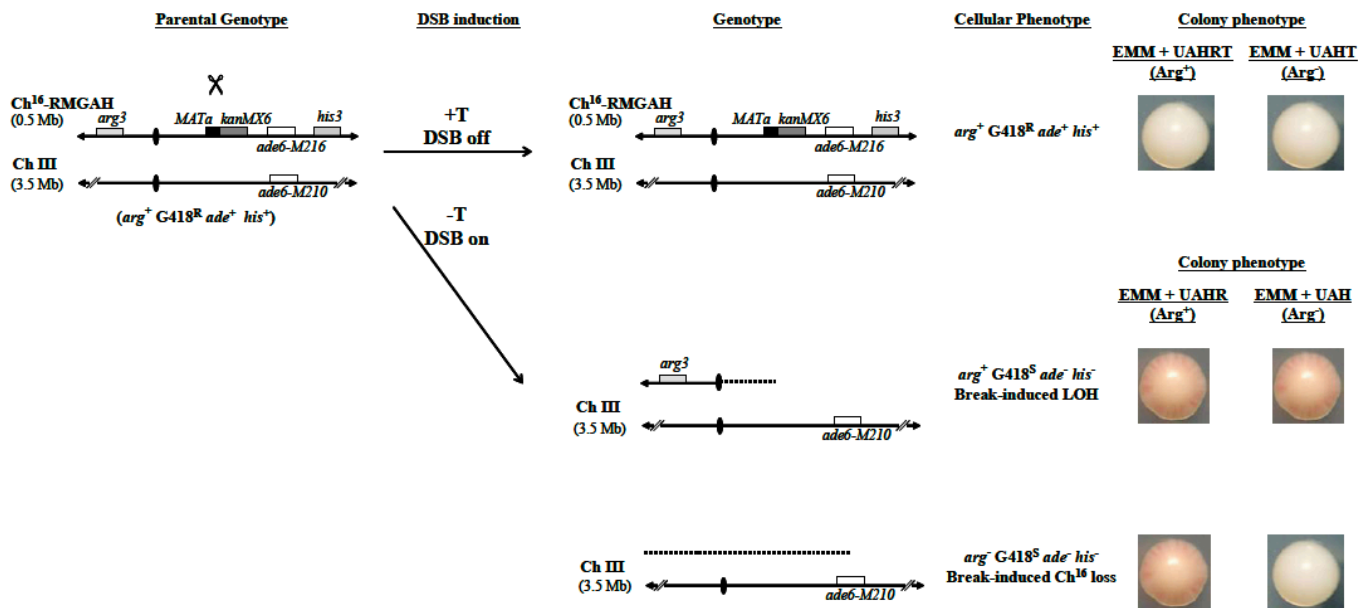

# Blaikley et al Supplementary Figure 2

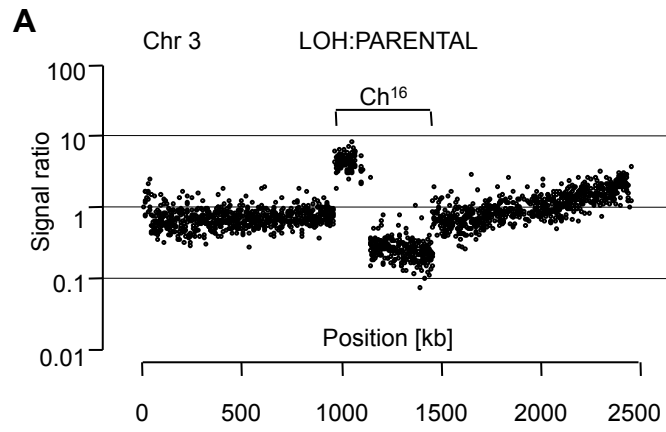

# Blaikley et al Supplementary Figure 3

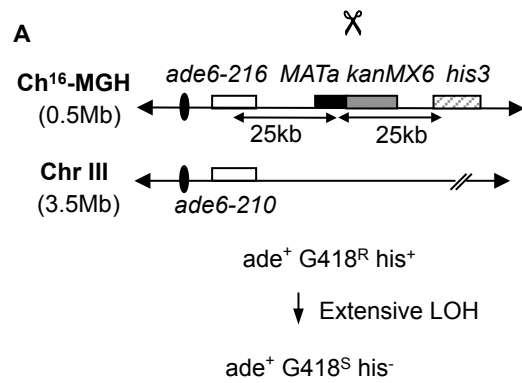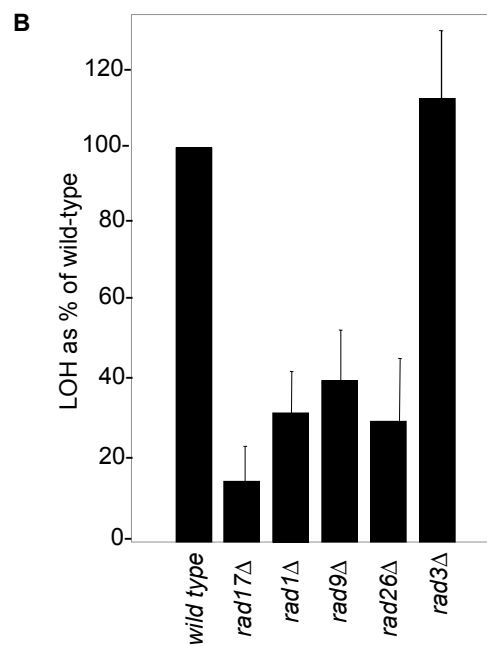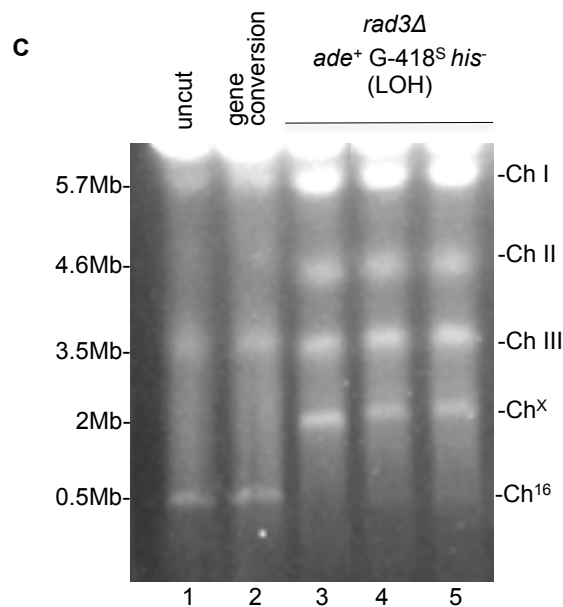

# Blaikley et al Supplementary Figure 4

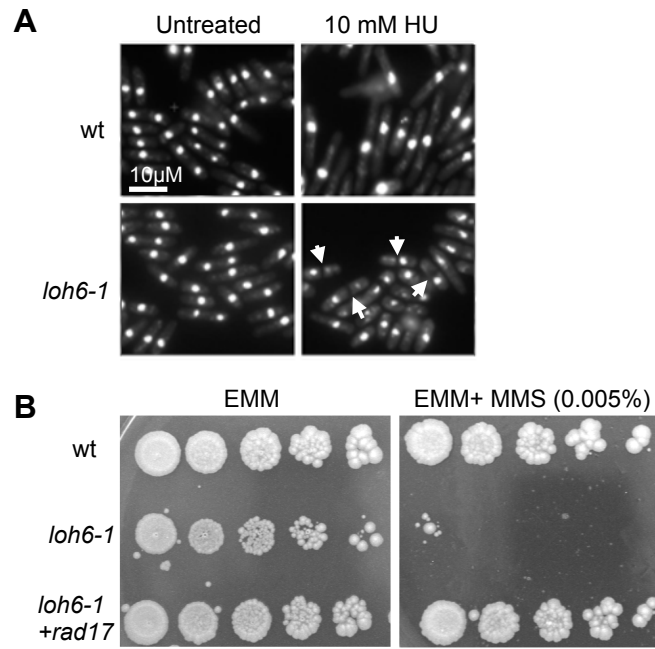

# Blaikley et al Supplementary Figure 5

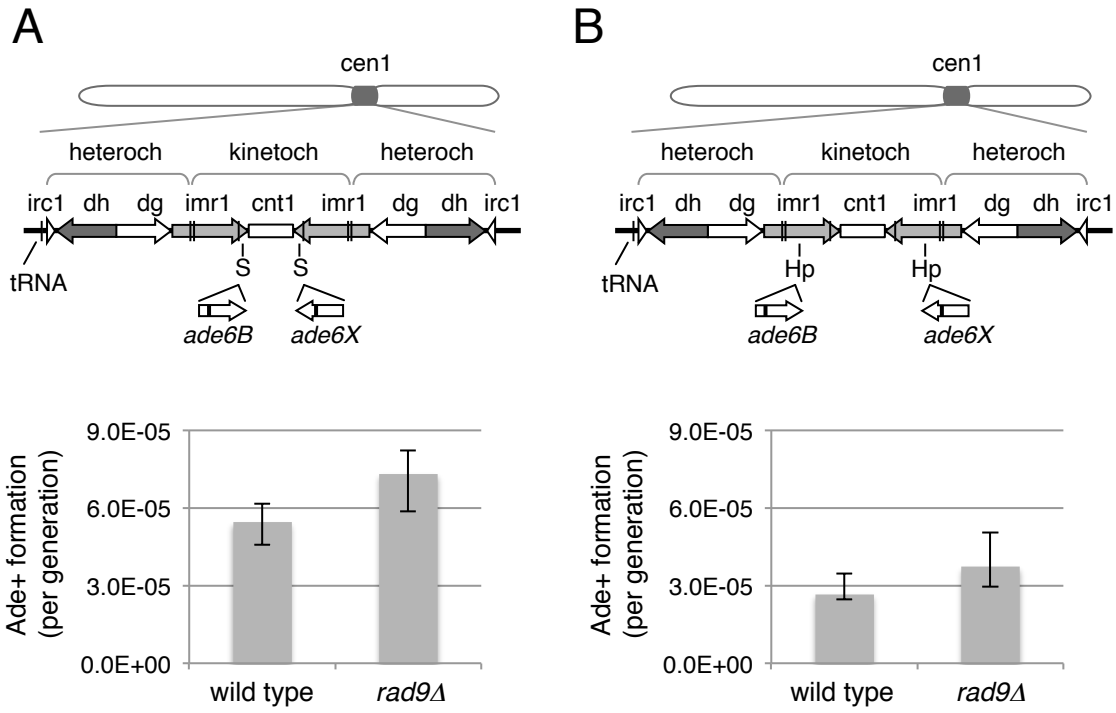

# Blaikley et al Supplementary Figure 6A

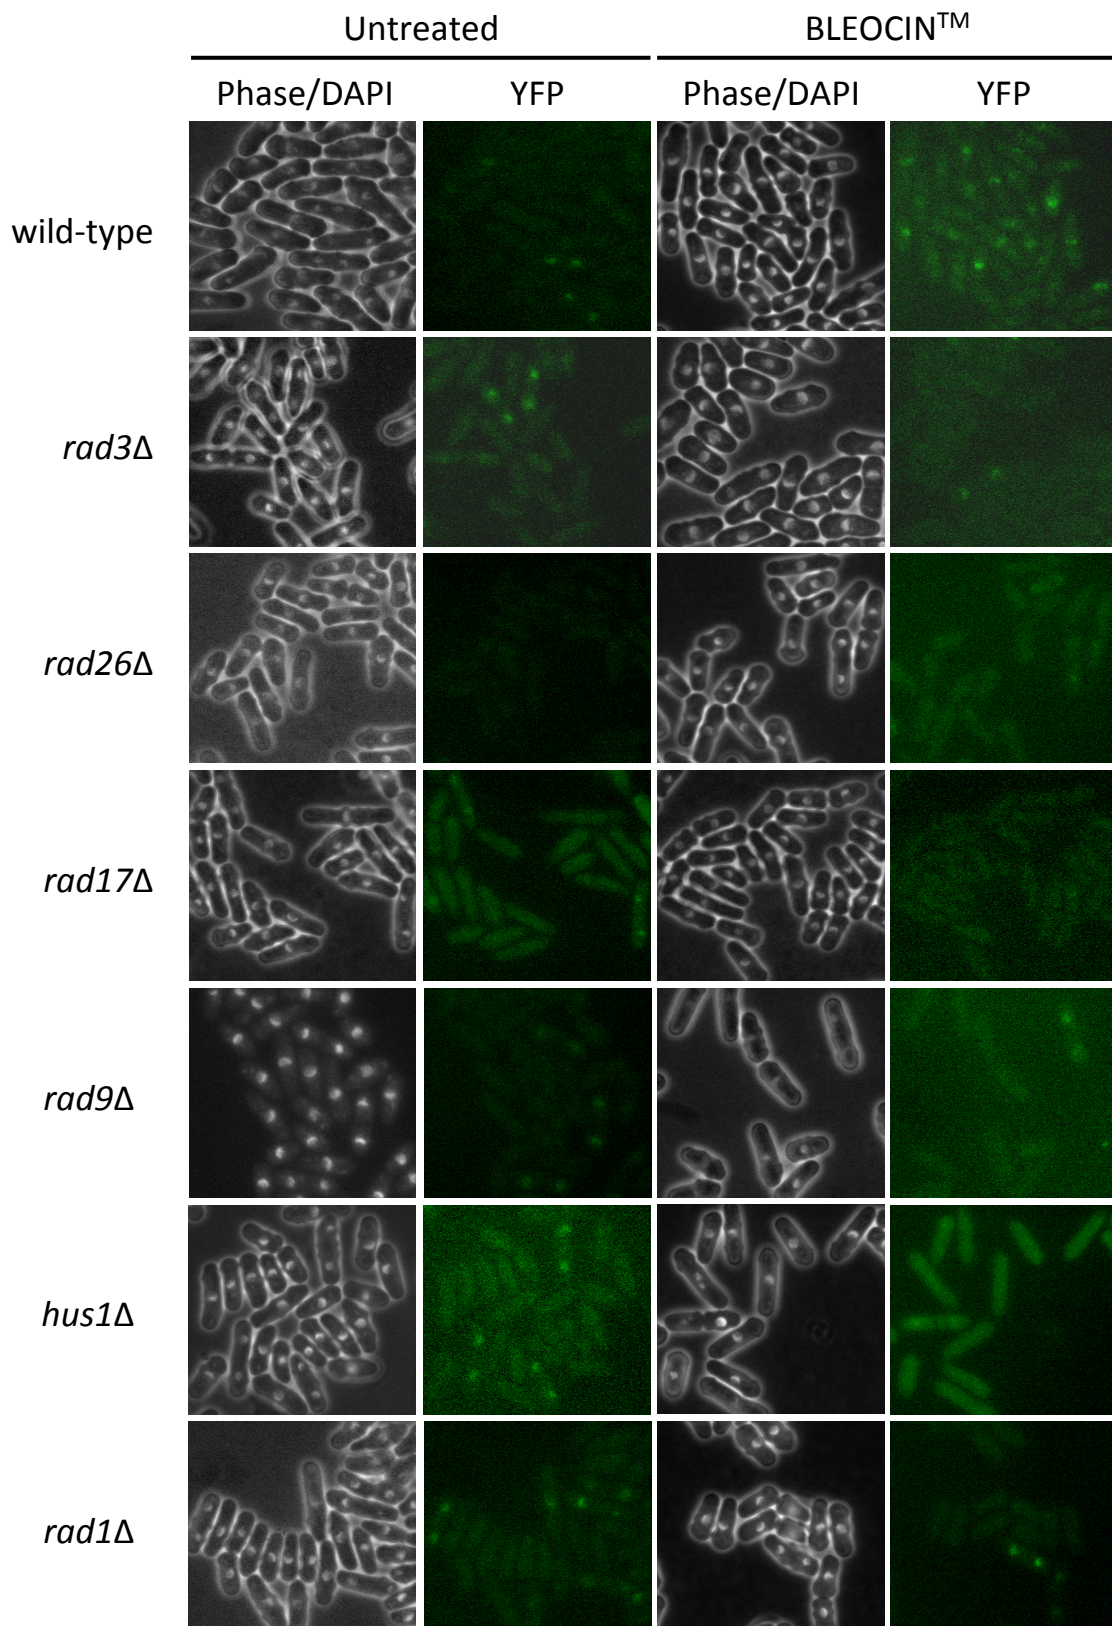

## Blaikley et al Supplementary Figure 6B

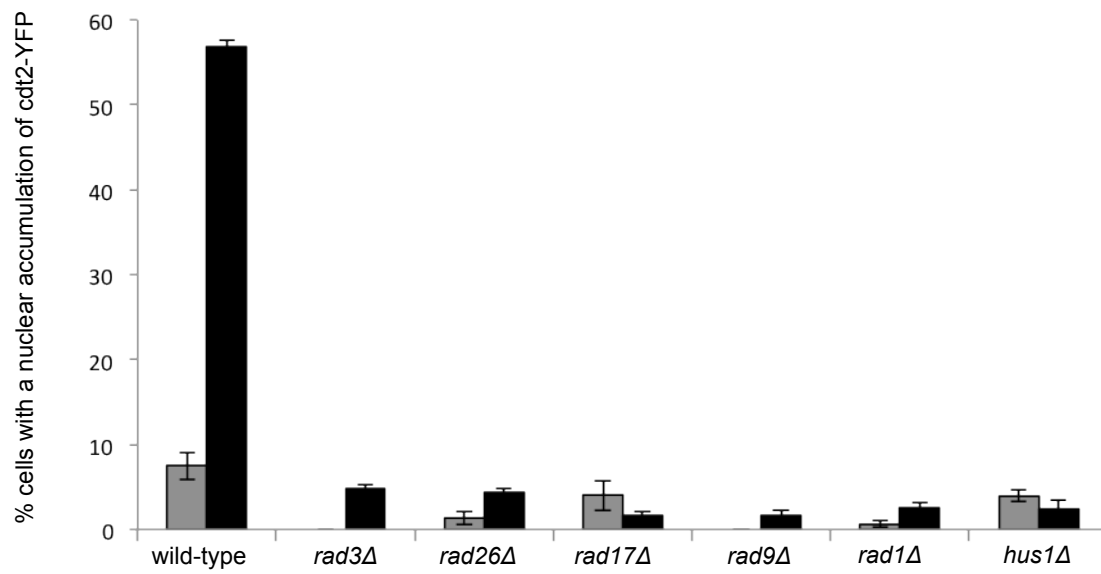

## Blaikley et al Supplementary data

### Supplementary Figure 1

#### Colony-sectoring assay for identifying suppressors of break-induced LOH.

Schematic of Ch<sup>16</sup>-RMGAH. Ch<sup>16</sup>-RMGAH, ChIII, centromeric regions (ovals), complementary heteroalleles (*ade6-M216* and *ade6-M210*; white), and the *his3* marker (vertical stripes; inserted ~50 Kb centromere-distal from *ade6-M216*) are shown as previously described (Cullen *et al.*, 2007). The *MATa* site (black) with an adjacent *kanMX6* resistance marker (grey) is inserted into *spcc23B6.06*, ~30 Kb centromere-proximal from *ade6-M216*, and in Ch<sup>16</sup>-RMHAH, *kanMX6* is replaced by *hph*. The *arg3* marker is inserted into *spcc1795.09* on the left arm of the minichromosome. The intact minichromosome ( $arg^+ G418^R ade^+ his^+$ ) remains when there is repression of pREP81-HO and a DSB is not induced (+T DSB off). An intact minichromosome would give white colonies (colony phenotype) on both EMM+UAHRT ( $Arg^+$ ; EMM plus arginine, uracil, histidine, low adenine and thiamine) and EMM+UAHT ( $Arg^-$ ; EMM plus uracil, histidine, low adenine and thiamine). Derepression of pREP81X-HO (not shown) generates a DSB (-T DSB on) at the *MATa* target site (scissors). Break-induced LOH ( $arg^+ G418^S ade^- his^-$ ) would result in loss of the *ade6-M216* heteroallele, which would accumulate a pink by-product on both EMM+UAHR ( $Arg^+$ ; EMM plus arginine uracil, histidine, and low adenine) and EMM+UAH ( $Arg^-$ ; EMM plus uracil, histidine and low adenine). Break-induced minichromosome loss (Ch<sup>16</sup> loss ;  $arg^- G418^S ade^- his^-$ )



would result in loss of the *arg3* marker and the *ade6-M216* heteroallele, which would accumulate a pink by-product on low adenine plates containing arginine (EMM+UAHR). However, on low adenine plates without the addition of arginine (EMM+UAH) cells lacking the minichromosome would not grow, therefore only the cells containing the intact minichromosome would survive, resulting in white colonies.

**Supplementary Figure 2.** CGH data of an isochromosome taken from (1) for comparison with Figure 2B. Note the increased signal ratio is across the left arm of the minichromosome (Ch16) is consistent with duplication and isochromosome formation. This is not observed in the truncated bands described in Figure 2.

**Supplementary Figure 3.** DNA damage checkpoint does not suppress break-induced LOH associated with DSB repair. (A) Schematic of the Ch<sup>16</sup>-MGH strain. Ch<sup>16</sup>-MGH, ChIII, centromeric regions (ovals), complementary heteroalleles (*ade6-M216* and *ade6-M210*; white) *ade5*<sup>+</sup> (vertical stripes), *MATa* site (black) with an adjacent *kanMX6* resistance marker (grey) and *his3*<sup>+</sup> marker (dark grey) are shown as previously described (2). Derepression of pREP81X-HO (not shown) generates a DSB at the *MATa* target site (scissors). Schematic for break-induced extensive LOH in this context is shown. (B) Percentage DSB-induced LOH in *rad17*Δ (TH1365), *rad1*Δ(TH1401), *rad9*Δ(TH1373), *rad26*Δ(TH1362), and *rad3*Δ (TH1369), as a percentage of wild type LOH are shown. (C) High resolution PFGE

analysis from *rad3Δ* Ch<sup>16</sup>-MGH uncut parental strain (TH1369; lane 1), *rad3Δ* Ch<sup>16</sup>-MGH *ade*<sup>+</sup>G418<sup>S</sup> *his*<sup>+</sup> gene conversion colony (lane 2), and individual *rad3Δ* *ade*<sup>+</sup>G418<sup>S</sup> *his*<sup>-</sup> (LOH) colonies. Band and chromosome sizes are shown.

**Supplementary Figure 4.** *loh6-1* encodes an allele of *rad17*. (A) *loh6-1* exhibits a cut phenotype in HU. DAPI stained wild-type Ch<sup>16</sup>-RMGAH (TH2130) or *loh6-1* (TH5735) strains either untreated or following exposure to 5mM HU for 6 h. 10μM size bar indicated. (B) Serial dilutions of wild type Ch<sup>16</sup>-RMGAH (TH2130) and *loh6-1* (TH5735) with pREP41X empty vector or pREP41X-*rad17* on EMM plates with 0.005% MMS, as indicated.

**Supplementary Figure 5.** Loss of Rad9 does not increase spontaneous recombination levels within the centromere. Spontaneous levels of recombination within the centromere were determined by a fluctuation test using wild-type and *rad9Δ* strains. 10 ml of EMM+Ade was inoculated with independent colonies formed on YE+Ade plates and incubated overnight at 33°C. The cells were plated onto EMM+Ade and EMM+Guanine to determine the number of colony-forming units and that of Ade<sup>+</sup> recombinants, respectively. The Ade<sup>+</sup> prototroph formation rate per generation was determined using the method of medians (3,4). (A) Recombination between *ade6B* and *ade6X* heteroalleles integrated at the *Sna*BI sites in *imr1*. (B) Recombination between the *ade6* heteroalleles integrated at the *Hpa*I sites in *imr1*. The median and 95% confidential intervals(5) are shown. *n* ≥12.

**Supplementary Figure 6. (A)** role for the DNA damage checkpoint pathway in RNR regulation. A. Methanol-fixed samples of asynchronous Cdt2-YFP wild-type, *rad3Δ*, *rad26Δ*, *rad17Δ*, *rad9Δ*, *rad1Δ*, or *hus1Δ* cells imaged following their growth in the presence or absence of 1μg/ml Bleocin for 1 hour. **(B)** Quantitation of Cdt2-YFP nuclear accumulation from experiments described above. A Minimum of 100 cells were counted and scored for nuclear accumulation of Cdt2-YFP. Mean +/- standard errors are shown for three independent experiments.

### Supplementary Materials and Methods

**Fluorescence microscopy** Asynchronous cultures were treated with 1μg/ml Bleocin for 1hr at 26°C or left untreated before being fixed in 100% methanol and stored in 100% acetone at -20°C. Samples were rehydrated and stained with 6'-diamidino-2-phenylindole (DAPI) and mounted (ProLong® Gold antifade reagent with DAPI; Invitrogen) before examination using Zeiss Axioplan 2ie microscope, Hamamatsu Orca ER camera and micromanager software.

### Supplementary References

1. Tinline-Purvis, H., Savory, A.P., Cullen, J.K., Dave, A., Moss, J., Bridge, W.L., Marguerat, S., Bahler, J., Ragoussis, J., Mott, R. *et al.* (2009) Failed gene conversion leads to extensive end processing and chromosomal rearrangements in fission yeast. *Embo J*, **28**, 3400-3412.
2. Cullen, J.K., Hussey, S.P., Walker, C., Prudden, J., Wee, B.Y., Dave, A., Findlay, J.S., Savory, A.P. and Humphrey, T.C. (2007) Break-induced loss of heterozygosity in fission yeast: dual roles for homologous recombination in promoting translocations and preventing de novo telomere addition. *Mol Cell Biol*, **27**, 7745-7757.
3. Lea, D.E. and Coulson, C.A. (1949) The distribution of the numbers of mutants in bacterial populations. *J. Genet.*, **49**, 264-285.

4. Lin, M., Chang, C.J. and Green, N.S. (1996) A new method for estimating high mutation rates in cultured cells. *Mutat Res*, **351**, 105-116.
5. Dixon, W.J. and Massey, F.J., Jr. (1969) *Introduction to Statistical Analysis*. McGraw-Hill Book Company, New York.
6. Moss, J., Tinline-Purvis, H., Walker, C.A., Folkes, L.K., Stratford, M.R., Hayles, J., Hoe, K.L., Kim, D.U., Park, H.O., Kearsey, S.E. *et al.* (2010) Break-induced ATR and Ddb1-Cul4(Cdt)(2) ubiquitin ligase-dependent nucleotide synthesis promotes homologous recombination repair in fission yeast. *Genes Dev*, **24**, 2705-2716.
7. Watson, A.T., Werler, P. and Carr, A.M. (2011) Regulation of gene expression at the fission yeast *Schizosaccharomyces pombe* *urg1* locus. *Gene*, **484**, 75-85.

**Supplementary Table 1. *S. pombe* strains used in this study.**

| Strain             | Genotype                                                                                                                        | Source              |
|--------------------|---------------------------------------------------------------------------------------------------------------------------------|---------------------|
| TH2125/6           | <i>leu1-32 arg3-D4 ade6-M210 ura4-D18 his3-D1</i> Ch <sup>16</sup> -RMGAH <i>h<sup>+</sup> /h<sup>-</sup></i>                   | J. Cullen, 2007 (2) |
| TH2130, 2131, 2132 | <i>leu1-32 arg3-D4 ade6-M210 ura4-D18 his3-D1</i> Ch <sup>16</sup> -RMGAH <i>h<sup>+</sup></i> pREP81X-HO                       | J. Cullen, 2007 (2) |
| TH2357             | <i>leu1-32 arg3-D4 ade6-M210 ura4-D18 his3-D1</i> Ch <sup>16</sup> -RMGAH <i>h<sup>+</sup></i> pREP81X                          | J. Cullen, 2007 (2) |
| TH2654/3165        | <i>leu1-32 arg3-D4 ade6-M210 ura4-D18 his3-D1</i> Ch <sup>16</sup> -RMHAH <i>h<sup>+</sup> /h<sup>-</sup></i>                   | J. Cullen, 2007 (2) |
| TH3317, 3318, 3318 | <i>leu1-32 ade6-M210 ura4-D18 his3-D1</i> Ch <sup>16</sup> -YAMGH <i>h<sup>+</sup></i> pREP81X-HO                               | This study          |
| TH3319             | <i>leu1-32 ade6-M210 ura4-D18 his3-D1</i> Ch <sup>16</sup> -YAMGH <i>h<sup>+</sup></i> pREP81X                                  | This study          |
| TH3382, 3378, 3380 | <i>exo1::ura4 leu1-32 arg3-D4 ade6-M210 ura4-D18 his3-D1</i> Ch <sup>16</sup> -RMGAH <i>h<sup>+</sup></i> pREP81X-HO            | This study          |
| TH3392             | <i>exo1::ura4 leu1-32 arg3-D4 ade6-M210 ura4-D18 his3-D1</i> Ch <sup>16</sup> -RMGAH <i>h<sup>+</sup></i> pREP81X               | This study          |
| TH4089             | <i>rad3<sup>W1700X</sup> leu1-32 arg3-D4 ade6-M210 ura4-D18 his3-D1</i> Ch <sup>16</sup> -RMGAH <i>h<sup>-</sup></i> pREP81X-HO | This study          |
| TH4090             | <i>rad3<sup>W1700X</sup> leu1-32 arg3-D4 ade6-M210 ura4-D18 his3-D1</i> Ch <sup>16</sup> -RMGAH <i>h<sup>-</sup></i> pREP81X-HO | This study          |
| TH2941, 2939, 3940 | <i>rad3::ura4 leu1-32 arg3-D4 ade6-M210 ura4-D18 his3-D1</i> Ch <sup>16</sup> -RMGAH <i>h<sup>-</sup></i> pREP81X-HO            | This study          |
| TH2938             | <i>rad3::ura4 leu1-32 arg3-D4 ade6-M210 ura4-D18 his3-D1</i> Ch <sup>16</sup> -RMGAH <i>h<sup>-</sup></i> pREP81X               | This study          |
| TH3410, 3408, 3409 | <i>rad26::ura4 leu1-32 arg3-D4 ade6-M210 ura4-D18 his3-D1</i> Ch <sup>16</sup> -RMGAH <i>h<sup>+</sup></i> pREP81X-HO           | This study          |
| TH3267             | <i>rad26::ura4 leu1-32 arg3-D4 ade6-M210 ura4-D18 his3-D1</i> Ch <sup>16</sup> -RMGAH <i>h<sup>+</sup></i> pREP81X              | This study          |
| TH3153, 3156, 3157 | <i>chk1::ura4 leu1-32 ade6-M210 ura4-D18 his3-D1</i> Ch <sup>16</sup> -YAMGH <i>h<sup>-</sup></i> pREP81X-HO                    | This study          |
| TH3159             | <i>chk1::ura4 leu1-32 ade6-M210 ura4-D18 his3-D1</i> Ch <sup>16</sup> -YAMGH <i>h<sup>+</sup></i> pREP81X                       | This study          |
| TH3383, 3384, 3385 | <i>crb2::ura4 leu1-32 arg3-D4 ade6-M210 ura4-D18 his3-D1</i> Ch <sup>16</sup> -RMGAH <i>h<sup>-</sup></i> pREP81X-HO            | This study          |

| Strain             | Genotype                                                                                                               | Source     |
|--------------------|------------------------------------------------------------------------------------------------------------------------|------------|
| TH3390             | <i>crb2::ura4 leu1-32 arg3-D4 ade6-M210 ura4-D18 his3-D1 Ch<sup>16</sup>-RMGAH h<sup>-</sup> pREP81X</i>               | This study |
| TH3395, 3394       | <i>cdc25::ura4 adh-cdc25 leu1-32 arg3-D4 ade6-M210 ura4-D18 his3-D1 Ch<sup>16</sup>-RMGAH h<sup>+</sup> pREP81X-HO</i> | This study |
| TH3396             | <i>cdc25::ura4 adh-cdc25 leu1-32 arg3-D4 ade6-M210 ura4-D18 his3-D1 Ch<sup>16</sup>-RMGAH h<sup>+</sup> pREP81X</i>    | This study |
| TH3258, 3257, 3256 | <i>cds1::ura4 leu1-32 arg3-D4 ade6-M210 ura4-D18 his3-D1 Ch<sup>16</sup>-RMGAH h<sup>-</sup> pREP81X-HO</i>            | This study |
| TH3269             | <i>cds1::ura4 leu1-32 arg3-D4 ade6-M210 ura4-D18 his3-D1 Ch<sup>16</sup>-RMGAH h<sup>-</sup> pREP81X</i>               | This study |
| TH3231, 3253, 3254 | <i>mrc1::ura4 leu1-32 arg3-D4 ade6-M210 ura4-D18 his3-D1 Ch<sup>16</sup>-RMGAH h<sup>+</sup> pREP81X-HO</i>            | This study |
| TH3261             | <i>mrc1::ura4 leu1-32 arg3-D4 ade6-M210 ura4-D18 his3-D1 Ch<sup>16</sup>-RMGAH h<sup>-</sup> pREP81X</i>               | This study |
| TH3623, 3475, 3476 | <i>rad3::ura4 chk1::ura4 leu1-32 ade6-M210 ura4-D18 his3-D1 Ch<sup>16</sup>-YAMGH h<sup>-</sup> pREP81X-HO</i>         | This study |
| TH3477             | <i>rad3::ura4 chk1::ura4 leu1-32 ade6-M210 ura4-D18 his3-D1 Ch<sup>16</sup>-YAMGH h<sup>-</sup> pREP81X</i>            | This study |
| TH3382, 3381       | <i>rad3::ura4 exo1::ura4 leu1-32 arg3-D4 ade6-M210 ura4-D18 his3-D1 Ch<sup>16</sup>-RMGAH h<sup>+</sup> pREP81X-HO</i> | This study |
| TH3389             | <i>rad3::ura4 exo1::ura4 leu1-32 arg3-D4 ade6-M210 ura4-D18 his3-D1 Ch<sup>16</sup>-RMGAH h<sup>+</sup> pREP81X</i>    | This study |
| TH3247, 3245, 3246 | <i>rad17::ura4 leu1-32 arg3-D4 ade6-M210 ura4-D18 his3-D1 Ch<sup>16</sup>-RMGAH h<sup>-</sup> pREP81X-HO</i>           | This study |
| TH3264             | <i>rad17::ura4 leu1-32 arg3-D4 ade6-M210 ura4-D18 his3-D1 Ch<sup>16</sup>-RMGAH h<sup>-</sup> pREP81X</i>              | This study |
| TH3241             | <i>rad1::kanMX6 leu1-32 arg3-D4 ade6-M210 ura4-D18 his3-D1 Ch<sup>16</sup>-RMHAH h<sup>+</sup> pREP81X-HO</i>          | This study |
| TH3376             | <i>rad1::kanMX6 leu1-32 arg3-D4 ade6-M210 ura4-D18 his3-D1 Ch<sup>16</sup>-RMHAH h<sup>+</sup> pREP81X</i>             | This study |
| TH3250, 3248, 3249 | <i>rad9::ura4 leu1-32 arg3-D4 ade6-M210 ura4-D18 his3-D1 Ch<sup>16</sup>-RMGAH h<sup>+</sup> pREP81X-HO</i>            | This study |
| TH3263             | <i>rad9::ura4 leu1-32 arg3-D4 ade6-M210 ura4-D18 his3-D1 Ch<sup>16</sup>-RMGAH h<sup>+</sup> pREP81X</i>               | This study |
| TH3244             | <i>hus1::kanMX6 leu1-32 arg3-D4 ade6-M210 ura4-D18 his3-D1 Ch<sup>16</sup>-RMHAH h<sup>+</sup> pREP81X-HO</i>          | This study |
| TH3697             | <i>hus1::kanMX6 leu1-32 arg3-D4 ade6-M210 ura4-D18 his3-D1 Ch<sup>16</sup>-RMHAH h<sup>+</sup> pREP81X</i>             | This study |

| Strain             | Genotype                                                                                                                 | Source     |
|--------------------|--------------------------------------------------------------------------------------------------------------------------|------------|
| TH3701, 3621, 3622 | <i>exo1::ura4 rad17::ura4 leu1-32 arg3-D4 ade6-M210 ura4-D18 his3-D1 Ch<sup>16</sup>-RMGAH h<sup>+</sup> pREP81X-HO</i>  | This study |
| TH3658             | <i>exo1::ura4 rad17::ura4 leu1-32 arg3-D4 ade6-M210 ura4-D18 his3-D1 Ch<sup>16</sup>-RMGAH h<sup>+</sup> pREP81X</i>     | This study |
| TH3618, 3455, 3456 | <i>rad3::ura4 rad17::ura4 leu1-32 arg3-D4 ade6-M210 ura4-D18 his3-D1 Ch<sup>16</sup>-RMGAH h<sup>+</sup> pREP81X-HO</i>  | This study |
| TH3446             | <i>rad3::ura4 rad17::ura4 leu1-32 arg3-D4 ade6-M210 ura4-D18 his3-D1 Ch<sup>16</sup>-RMGAH h<sup>+</sup> pREP81X</i>     | This study |
| TH3529, 3527, 3528 | <i>crb2::ura4 rad17::ura4 leu1-32 arg3-D4 ade6-M210 ura4-D18 his3-D1 Ch<sup>16</sup>-RMGAH h<sup>-</sup> pREP81X-HO</i>  | This study |
| TH3540             | <i>crb2::ura4 rad17::ura4 leu1-32 arg3-D4 ade6-M210 ura4-D18 his3-D1 Ch<sup>16</sup>-RMGAH h<sup>-</sup> pREP81X</i>     | This study |
| TH3454, 3453, 3703 | <i>rad9::ura4 rad17::ura4 leu1-32 arg3-D4 ade6-M210 ura4-D18 his3-D1 Ch<sup>16</sup>-RMGAH h<sup>-</sup> pREP81X-HO</i>  | This study |
| TH3452             | <i>rad9::ura4 rad17::ura4 leu1-32 arg3-D4 ade6-M210 ura4-D18 his3-D1 Ch<sup>16</sup>-RMGAH h<sup>-</sup> pREP81X</i>     | This study |
| TH4093             | <i>rad3<sup>W1700X</sup> leu1-32 arg3-D4 ade6-M210 ura4-D18 his3-D1 Ch<sup>16</sup>-RMGAH h<sup>-</sup> pREP41X-rad3</i> | This study |
| TH2093             | <i>arg3-D4, ade6-D1, ura4-D18, leu1-32, his3-D1 h<sup>+</sup></i>                                                        | Lab stock  |
| TH2094             | <i>arg3-D4, ade6-D1, ura4-D18, leu1-32, his3-D1 h<sup>-</sup></i>                                                        | Lab stock  |
| TH4355             | <i>spd1::hph leu1-32 arg3-D4 ade6- ura4-D18 his3-D1 h<sup>-</sup></i>                                                    | Lab stock  |
| TH7329             | <i>rad3::kanMX, arg3-D4, ade6-D1, ura4-D18, leu1-32, his3-D1 h<sup>-</sup></i>                                           | This study |
| TH8295             | <i>rad3::kanMX, spd1::hph arg3-D4, ade6-, ura4-D18, leu1-32, his3-D1</i>                                                 | This study |
| TH7330             | <i>rad26::kanMX, arg3-D4, ade6-D1, ura4-D18, leu1-32, his3-D1 h<sup>-</sup></i>                                          | This study |
| TH8194             | <i>rad26::kanMX, spd1::hph arg3-D4, ade6-, ura4-D18, leu1-32, his3-D1</i>                                                | This study |
| TH7331             | <i>rad17::kanMX, arg3-D4, ade6-D1, ura4-D18, leu1-32, his3-D1 h<sup>-</sup></i>                                          | This study |
| TH7794             | <i>rad17::kanMX, spd1::hph arg3-D4, ade6-, ura4-D18, leu1-32, his3-D1</i>                                                | This study |
| TH7414             | <i>rad9::kanMX, arg3-D4, ade6-D1, ura4-D18, leu1-32, his3-D1 h<sup>+</sup></i>                                           | This study |
| TH7146             | <i>rad9::kanMX, spd1::hph arg3-D4, ade6-, ura4-D18, leu1-32, his3-D1</i>                                                 | This study |

| Strain                      | Genotype                                                                                                              | Source         |
|-----------------------------|-----------------------------------------------------------------------------------------------------------------------|----------------|
| TH7333                      | <i>rad1::kanMX, arg3-D4, ade6-D1, ura4-D18, leu1-32, his3-D1 h<sup>-</sup></i>                                        | This study     |
| TH8249                      | <i>rad1::kanMX, spd1::hph arg3-D4, ade6-, ura4-D18, leu1-32, his3-D1</i>                                              | This study     |
| TH8296                      | <i>hus1::kanMX, arg3-D4, ade6-D1, ura4-D18, leu1-32, his3-D1 h<sup>-</sup></i>                                        | This study     |
| TH8195                      | <i>hus1::kanMX, spd1::hph arg3-D4, ade6-, ura4-D18, leu1-32, his3-D1</i>                                              | This study     |
| TH4125                      | <i>leu1-32 arg3-D4 ade6-M210 ura4-D18 his3-D1 Ch<sup>16</sup>-RMYAH h<sup>-</sup> pREP81X</i>                         | Moss et al (6) |
| TH4121<br>TH4122<br>TH4104* | <i>leu1-32 arg3-D4 ade6-M210 ura4-D18 his3-D1 Ch<sup>16</sup>-RMYAH pREP81X-HO</i>                                    | Moss et al (6) |
| TH4076                      | <i>spd1::ura4 leu1-32 arg3-D4 ade6-M210 ura4-D18 his3-D1 Ch<sup>16</sup>-RMYAH h<sup>-</sup> pREP81X</i>              | Moss et al (6) |
| TH4077<br>TH4078<br>TH4079* | <i>spd1::ura4 leu1-32 arg3-D4 ade6-M210 ura4-D18 his3-D1 Ch<sup>16</sup>-RMYAH pREP81X-HO</i>                         | Moss et al (6) |
| TH7423                      | <i>rad26::kanMX leu1-32 arg3-D4 ade6-M210 ura4-D18 his3-D1 Ch<sup>16</sup>-RMYAH h<sup>+</sup> pREP81X</i>            | This study     |
| TH7424<br>TH7425<br>TH7426* | <i>rad26::kanMX leu1-32 arg3-D4 ade6-M210 ura4-D18 his3-D1 Ch<sup>16</sup>-RMYAH pREP81X-HO</i>                       | This study     |
| TH7584                      | <i>rad26::kanMX spd1::ura4 leu1-32 arg3-D4 ade6-M210 ura4-D18 his3-D1 Ch<sup>16</sup>-RMYAH h<sup>+</sup> pREP81X</i> | This study     |
| TH7585<br>TH7586<br>TH7587* | <i>rad26::kanMX spd1::ura4 leu1-32 arg3-D4 ade6-M210 ura4-D18 his3-D1 Ch<sup>16</sup>-RMYAH pREP81X-HO</i>            | This study     |
| TH7427                      | <i>rad17::kanMX leu1-32 arg3-D4 ade6-M210 ura4-D18 his3-D1 Ch<sup>16</sup>-RMYAH h<sup>+</sup> pREP81X</i>            | This study     |
| TH7429<br>TH7430*           | <i>rad17::kanMX leu1-32 arg3-D4 ade6-M210 ura4-D18 his3-D1 Ch<sup>16</sup>-RMYAH pREP81X-HO</i>                       | This study     |
| TH7565                      | <i>rad17::kanMX spd1::ura4 leu1-32 arg3-D4 ade6-M210 ura4-D18 his3-D1 Ch<sup>16</sup>-RMYAH h<sup>-</sup> pREP81X</i> | This study     |
| TH7566<br>TH7567<br>TH7568* | <i>rad17::kanMX spd1::ura4 leu1-32 arg3-D4 ade6-M210 ura4-D18 his3-D1 Ch<sup>16</sup>-RMYAH pREP81X-HO</i>            | This study     |
| TH7588                      | <i>rad9::kanMX leu1-32 arg3-D4 ade6-M210 ura4-D18 his3-D1 Ch<sup>16</sup>-RMYAH h<sup>+</sup> pREP81X</i>             | This study     |
| TH7589<br>TH7590<br>TH7591* | <i>rad9::kanMX leu1-32 arg3-D4 ade6-M210 ura4-D18 his3-D1 Ch<sup>16</sup>-RMYAH pREP81X-HO</i>                        | This study     |
| TH7463                      | <i>rad9::kanMX spd1::ura4 leu1-32 arg3-D4 ade6-M210 ura4-D18 his3-D1 Ch<sup>16</sup>-RMYAH h<sup>-</sup> pREP81X</i>  | This study     |
| TH7464<br>TH7465<br>TH7466* | <i>rad9::kanMX spd1::ura4 leu1-32 arg3-D4 ade6-M210 ura4-D18 his3-D1 Ch<sup>16</sup>-RMYAH pREP81X-HO</i>             | This study     |



| Strain                      | Genotype                                                                                               | Source                             |
|-----------------------------|--------------------------------------------------------------------------------------------------------|------------------------------------|
| TH7493                      | <i>rad1::kanMX leu1-32 arg3-D4 ade6-M210 ura4-D18 his3-D1</i> Ch <sup>16</sup> -RMYAH <i>h</i> pREP81X | This study                         |
| TH7494<br>TH7495<br>TH7496* | <i>rad1::kanMX leu1-32 arg3-D4 ade6-M210 ura4-D18 his3-D1</i> Ch <sup>16</sup> -RMYAH pREP81X-HO       | This study                         |
| TH7431                      | <i>hus1::kanMX leu1-32 arg3-D4 ade6-M210 ura4-D18 his3-D1</i> Ch <sup>16</sup> -RMYAH <i>h</i> pREP81X | This study                         |
| TH7432<br>TH7433<br>TH7434* | <i>hus1::kanMX leu1-32 arg3-D4 ade6-M210 ura4-D18 his3-D1</i> Ch <sup>16</sup> -RMYAH pREP81X-HO       | This study                         |
| TH7165                      | <i>cdt2-YFP-hph leu1-32 ade6-M216 ura4-D18 h<sup>+</sup></i>                                           | This study                         |
| TH7197                      | <i>cdt2-YFP-hph leu1-32 ade6-M216 ura4-D18 h<sup>-</sup></i>                                           | This study                         |
| TH7169                      | <i>rad3::kanMX cdt2-YFP-hph leu1-32 ade6- ura4-D18 h<sup>-</sup></i>                                   | This study                         |
| TH7170                      | <i>rad26::kanMX cdt2-YFP-hph leu1-32 ade6- ura4-D18 h<sup>-</sup></i>                                  | This study                         |
| TH7171                      | <i>rad17::kanMX cdt2-YFP-hph leu1-32 ade6-M210 ura4-D18 his3-D1 h<sup>+</sup></i>                      | This study                         |
| TH7172                      | <i>rad9::kanMX cdt2-YFP-hph leu1-32 ade6-M210 ura4-D18 h<sup>+</sup></i>                               | This study                         |
| TH7174                      | <i>rad1::kanMX cdt2-YFP-hph leu1-32 ade6-M210 ura4-D18 h<sup>-</sup></i>                               | This study                         |
| TH7175                      | <i>hus1::kanMX cdt2-YFP-hph leu1-32 ade6-M210 ura4-D18 his3-D1 h<sup>-</sup></i>                       | This study                         |
| TH7184                      | <i>urg1::urg1 P<sub>urg1lox</sub>-HO LE_L-HOcs-his3+-EU_R his3-D1 leu1-32</i>                          | <i>A. Watson et al</i><br>2011 (7) |
| TH8091                      | <i>rad3::ura4 urg1::urg1 P<sub>urg1lox</sub>-HO LE_L-HOcs-his3+-EU_R his3-D1 leu1-32 ura4-D18</i>      | This study                         |
| TH8040                      | <i>rad17::ura4 urg1::urg1 P<sub>urg1lox</sub>-HO LE_L-HOcs-his3+-EU_R his3-D1 leu1-32 ura4-D18</i>     | This study                         |
| TH8050                      | <i>rad9::ura4 urg1::urg1 P<sub>urg1lox</sub>-HO LE_L-HOcs-his3+-EU_R his3-D1 leu1-32 ura4-D18</i>      | This study                         |

Ch<sup>16</sup>-RMGAH (Ch<sup>16</sup> *yps1::arg3 ert1::MATa-kanMX6 ade6-M216 cid2::his3*). Ch<sup>16</sup>-YAMGH (Ch<sup>16</sup> *chk1::Hph ade6-M216 rad21::MATa-kanMX6 cid2::his3*) Mating type for the first strain only. Ch<sup>16</sup>-RMHAH (Ch<sup>16</sup> *yps1::arg3 ert1::MATa-Hph ade6-M216 cid2::his3*). \*independent isolates (*h<sup>+</sup>* or *h<sup>-</sup>*).
